# Supplementary material
Source: PubMed Central journal article supplement (PMC1564314)

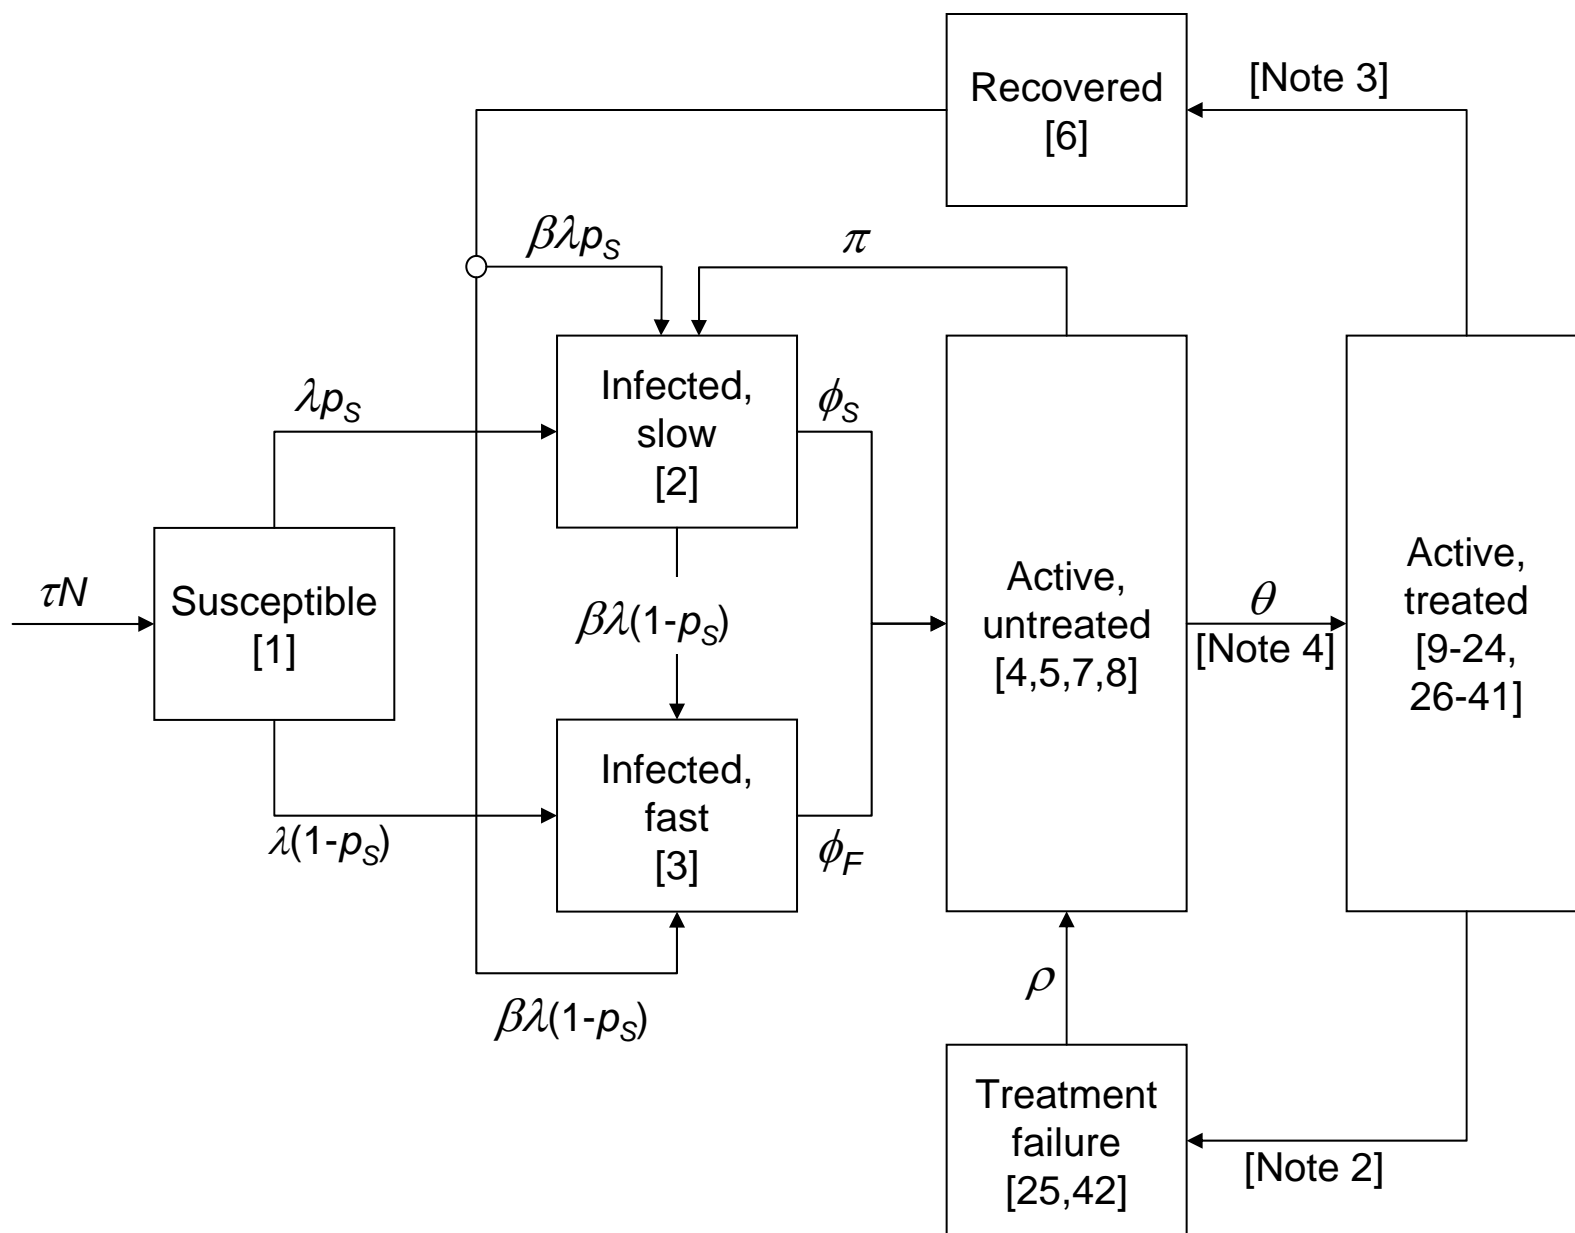

Supplement: pmed.0030273.sg001.pdf [file pmed.0030273.sg001.pdf]

Proportion new smear-positive cases

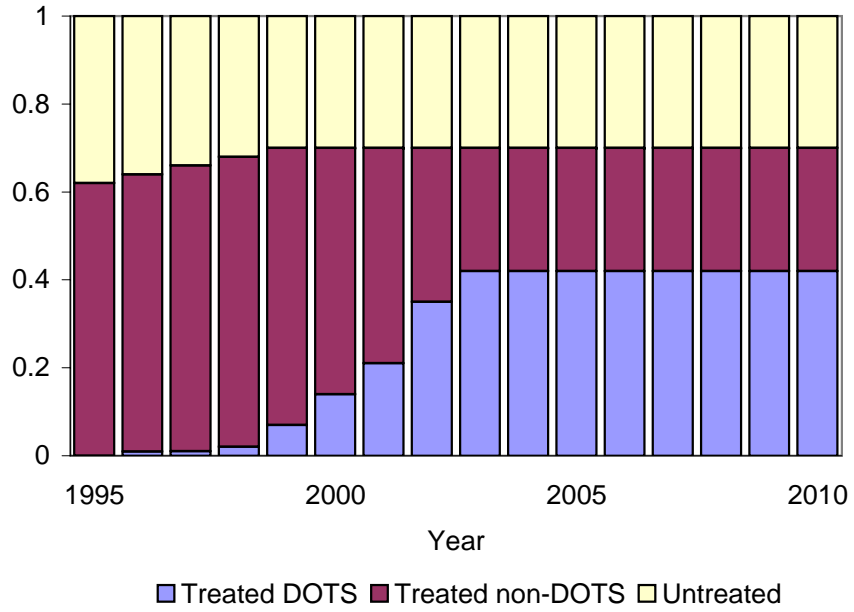

Proportion new smear-positive cases

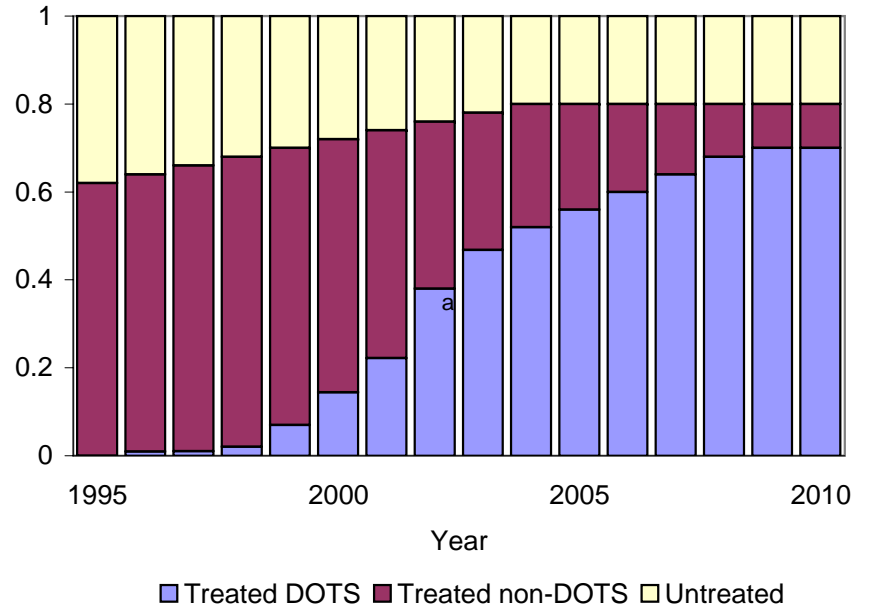

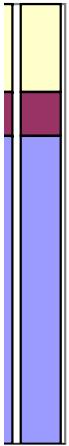

2010

Supplement: pmed.0030273.sg002.pdf [file pmed.0030273.sg002.pdf]

### 25 percent infectious

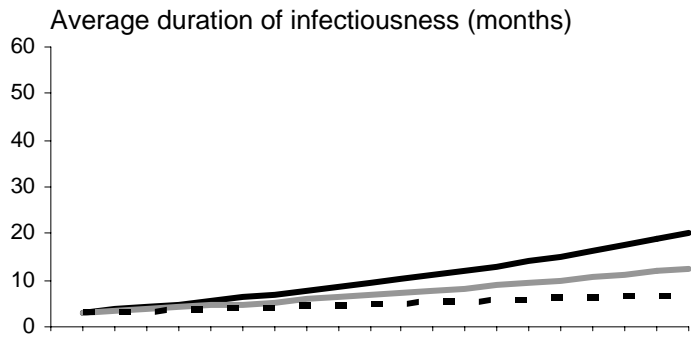

### 75 percent infectious

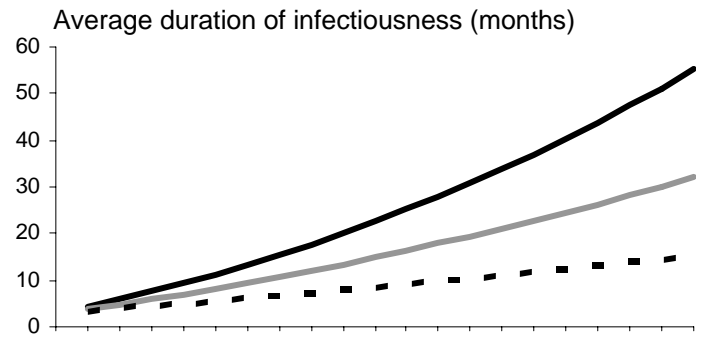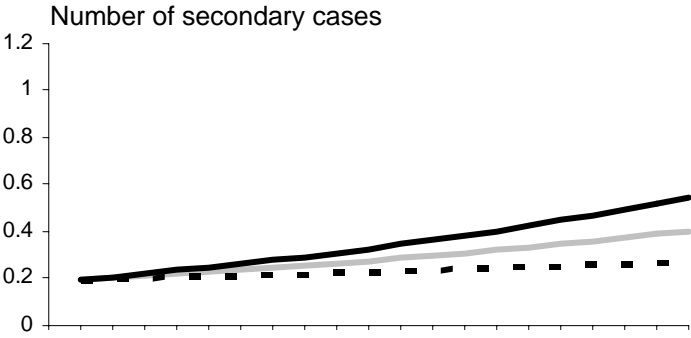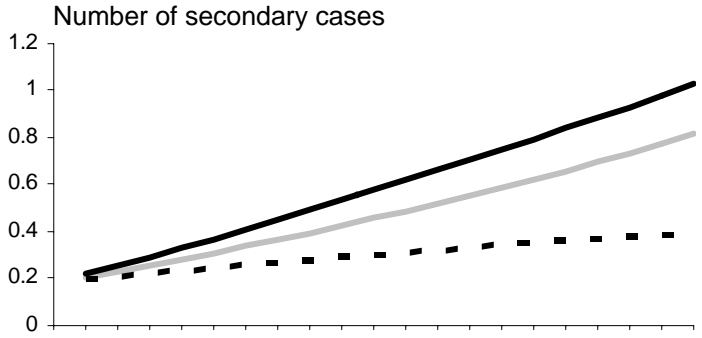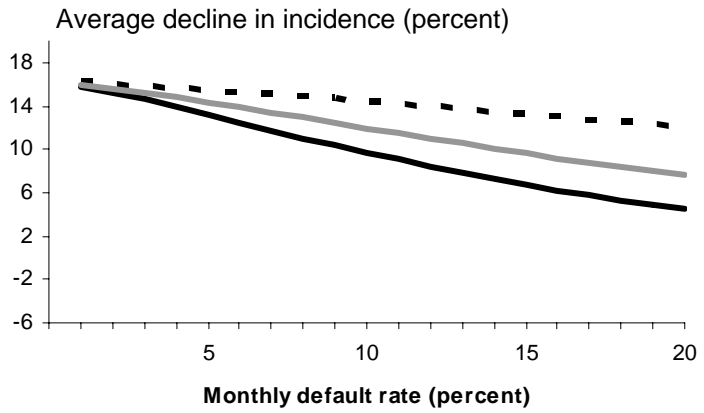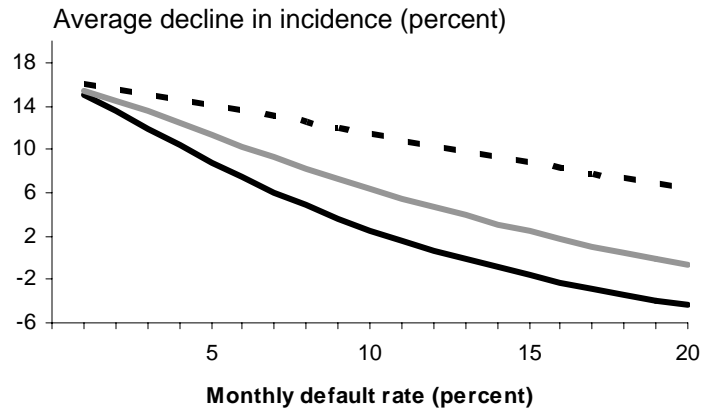

Supplement: pmed.0030273.sg003.pdf [file pmed.0030273.sg003.pdf]
